# Supplementary material for: Sulfur element achieves rapid and stable migration of Li+ in oxide cathode materials
Source: Royal Society of Chemistry journal article supplement (doi:10.1039/d4ta09238d), 2025-01-01
Supplement: d4ta09238d1.pdf [file d4ta09238d1.pdf]

## 1 **Experimental**

### 2 **Materials synthesis**

3 Firstly, the  $\text{Ni}_{0.90}\text{Co}_{0.05}\text{Mn}_{0.05}(\text{OH})_2$  precursor material was obtained through  
4 coprecipitation method. Then the mixture of LiOH,  $\text{Ni}_{0.90}\text{Co}_{0.05}\text{Mn}_{0.05}(\text{OH})_2$ ,  $(\text{CH}_3\text{COO})_3\text{Al}$ ,  
5  $\text{TiO}_2$  and  $\text{Al}_2(\text{SO}_4)_3$  was weighed according to the molar ratio of 1.08: 1: x: y: z, and put into a  
6 mortar with anhydrous ethanol for dispersion, the dried homogeneous powder sample was  
7 obtained by grinding in the mortar under an infrared lamp for about 30 min. Finally, the  
8 mixed powder was placed in a tube furnace under oxygen atmosphere for segmental  
9 calcination. The first stage was held at 500 °C for 5 h, the second stage was held at 700 °C for  
10 10 h, where the heating rate was 5 °C min<sup>-1</sup>, the oxygen airflow rate was 200 cubic foot per  
11 minute, and the cooling rate was 2 °C min<sup>-1</sup>, and finally the calcination process was  
12 completed by dropping to room temperature, the calcined powder samples were collected and  
13 labeled as NCM (x=0, y=0, z=0), A-NCM (x=0.02, y=0, z=0), T-NCM (x=0, y=0.02, z=0),  
14 AT-NCM (x=0.01, y=0.01, z=0), ATS-NCM (x=0, y=0.01, z=0.005) respectively.

### 15 **Materials characterizations**

16 The crystalline phases of the NCM, A-NCM, T-NCM, AT-NCM and ATS-NCM  
17 powders were performed by X-ray diffraction (XRD) using Cu K $\alpha$  radiation (X'pert PRO,  
18 PANalytical). The chemical composition of ATS-NCM was identified by inductively coupled  
19 plasma (ICP, OPIMA 8300, PerkinElmer). The surface information of the materials was  
20 characterized by X-ray photoelectron spectroscopy (XPS; Thermo Escalab 250Xi, USA). The  
21 microstructure and morphology of the materials were measured by a field-emission scanning  
22 electron microscopy (FESEM) (Regulus 8230) and energy dispersive spectrometer (EDS)  
23 mapping. The cross-sectional SEM samples of particles were prepared by a focused ion beam  
24 (FIB) technique (FEI Helios Nano Lab 450). The C 1s peak of a hydrocarbon located at 284.8  
25 eV Binding Energy was act as calibration. Transmission electron microscopy (TEM) and  
26 high-resolution transmission electron microscopy (HRTEM) tests were conducted using a  
27 JEM-2100F transmission electron microscope. Atomic force microscopy (AFM)  
28 characterization was performed using a Bruker Dimensions ICON with a nano mirror V  
29 controller. Over 1000 points across the entire region was select to calculate the average  
30 Young's modulus within a specific range. Differential Scanning Calorimetry (DSC, TA

1 Q2000) was tested using delithiated electrode material charged to 4.6 V at a heating rate of 5  
2 °C min<sup>-1</sup> in an N<sub>2</sub> atmosphere within the temperature range of 100 to 300 °C, encapsulating 5  
3 mg of the sample in a high-pressure stainless steel crucible and add approximately 50 wt%  
4 electrolyte.

## 5 **Electrochemical measurements**

6 CR2025 coin-type half-cells (or full battery) were employed to assess the  
7 electrochemical performances of the cathode materials. The homogeneous cathode slurry was  
8 obtained by the active materials, super P (as conductive) and polyvinylidene fluoride (PVDF,  
9 as binder) with an 8:1:1 wt ratio in N-methyl-1, 2-pyrrolidone (NMP) solvent. The cathode  
10 slurry was coated on the Al foil current collector and then casted into a diameter 11 mm tablet  
11 electrode with an active material mass loading of 2.5 ± 0.15 mg cm<sup>-2</sup>. The argon-filled  
12 glovebox (H<sub>2</sub>O < 0.1 ppm, O<sub>2</sub> < 0.1 ppm) was used to assemble the cells with Celgard 2400  
13 as the separator, Li metal (graphite electrode with the active material mass loading of 2.5 ±  
14 0.15 mg cm<sup>-2</sup> in full battery) as the counter electrode, and 1 M LiPF<sub>6</sub> in ethyl  
15 carbonate/diethylene carbonate/dimethyl carbonate (EC/DEC/DMC = 1:1:1 in volume) as the  
16 electrolyte solution, respectively. Galvanostatic charge/discharge tests within the voltage  
17 range of 3.0–4.6 V at 30 ± 1 °C (Land CT2001A for coin-type cell) in the constant  
18 environmental chamber. For the current rate, the grams refer to the cathode active material for  
19 all coin-type half-cell and full-cell measurements. The cyclic voltammetry (CV) tests were  
20 performed in CHI660E electrochemical workstation with sweep rate of 0.1 mV s<sup>-1</sup> and  
21 voltage window of 3.0–4.6 V. Electrochemical impedance spectroscopy (EIS, frequency  
22 range: 100,000–0.1 Hz, 3.0 V) was performed on a CHI6081D electrochemical system (Chen  
23 Hua).

## 24 **In-situ XRD**

25 In-situ XRD cell was employed with a Be window for X-ray penetration, the Al window  
26 acts as the current collector of the electrode. The fabrication process of the electrode for the  
27 in-situ XRD (BRUCKER D8 ADVANCE) measurement is same as that of the half-cell. The  
28 average loading of the electrode is approximately 4 mg cm<sup>-2</sup>. The in-situ cell was aging for 24  
29 h after assembled in glove box and charged/discharged at a rate of 0.05C. During the  
30 charging/discharging process, XRD measurement was repeated from 10°–90° with 20 min per

1 cycle.

## 2 **Operando differential electrochemical mass spectrometry (DEMS)**

3       The operation of DEMS is combined with GCD and CV measurements, consisting of a  
4 commercial quadrupole mass spectrometer (Hiden Analytical, model: HPR 40) and a  
5 Swagelok type DEMS cell (ECC Cell), with two glued capillary tubes used to purify the gas  
6 inlet and outlet. The flow rate of the purging gas is 0.5mL min<sup>-1</sup>. During the charging and  
7 discharging process, high-purity Ar is used as the working gas. In order to quantify the release  
8 of oxygen and other gases, a known constant Ar flow rate is used as the carrier gas. DEMS  
9 batteries are electrochemically controlled using a LAND cycle meter with a current density of  
10 0.1C.

11

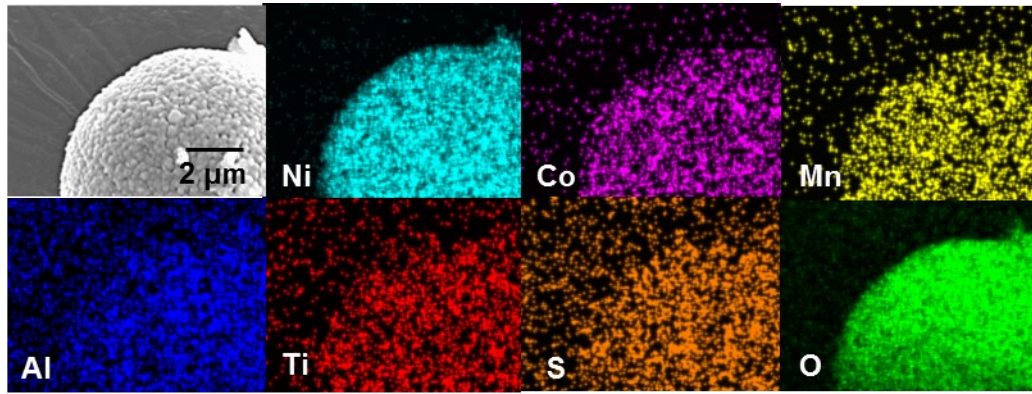

1

2 Figure S1 EDS mapping elemental analysis of ATS-NCM sample.

3

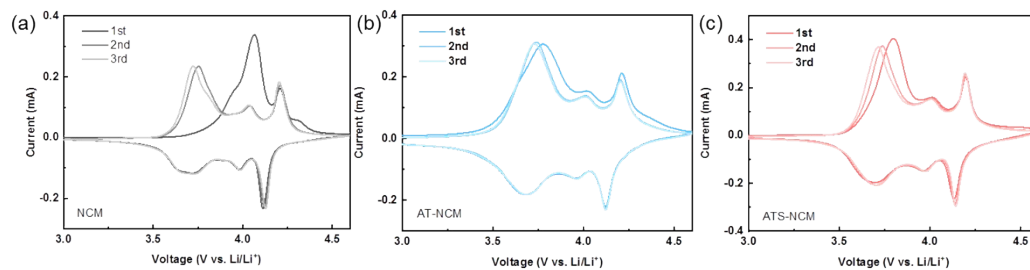

1

2 Figure S2 The CV for the first three cycles of NCM, AT-NCM and ATS-NCM electrodes.

3

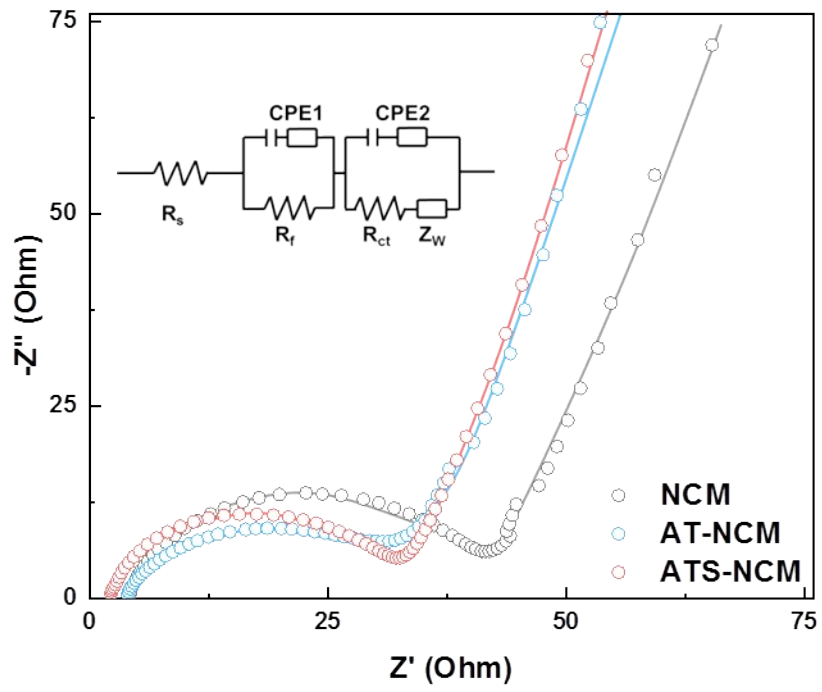

1

2 Figure S3 EIS Nyquist plots of NCM, AT-NCM and ATS-NCM.

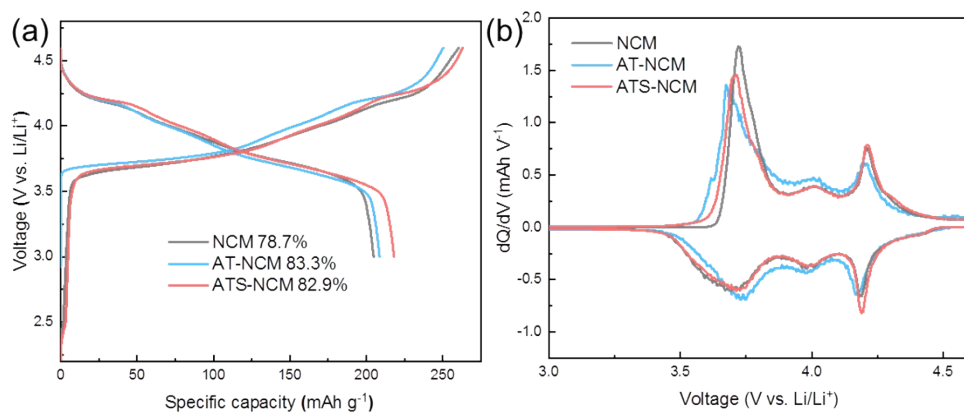

1

2 Figure S4 The first cycle charge discharge curves and corresponding dQ/dVq curves of NCM,  
 3 AT-NCM and ATS-NCM cathodes.

4



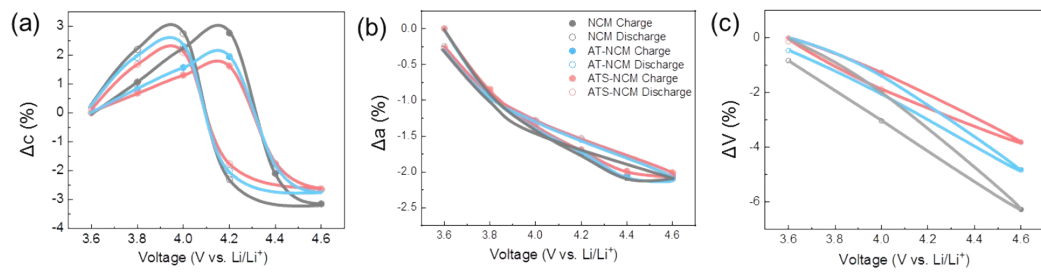

1

2 Figure S5 (a) a-lattice, (b) c-lattice and (c) volume parameter change rate of NCM, AT-NCM  
 3 and ATS-NCM electrodes.

4

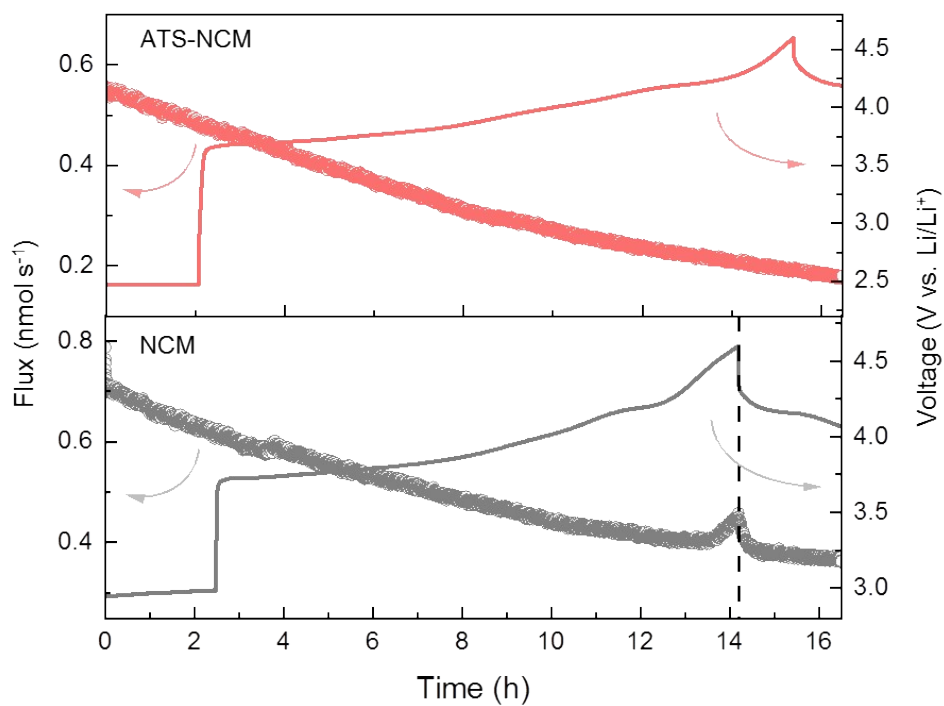

1

2 Figure S6 The DEMS curves of NCM and ATS-NCM electrodes during the initial cycle.

3

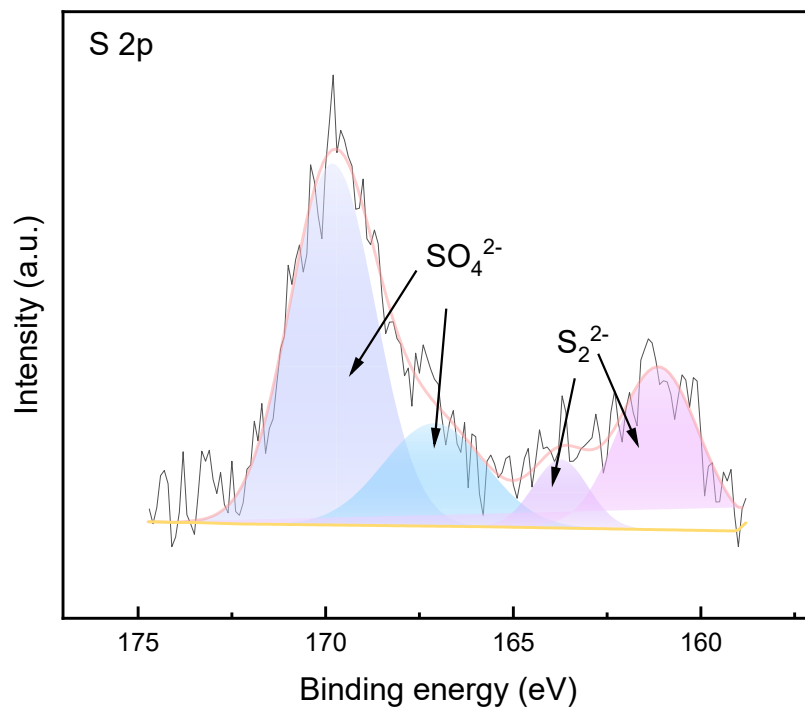

- 1
- 2 Figure S7 S 2p state for the ATS-NCM sample after cycling.
- 3

1 Table S1 EDS testing of element concentration in cross-section

| Element | Line type | Apparent concentration | k ratio | Wt%    | Wt%/Sigma | At%    | Standard sample label          |
|---------|-----------|------------------------|---------|--------|-----------|--------|--------------------------------|
| O       | k-line    | 33.03                  | 0.11116 | 18.69  | 0.26      | 45.56  | SiO <sub>2</sub>               |
| Ni      | k-line    | 80.47                  | 0.80472 | 73.17  | 0.30      | 48.61  | Ni                             |
| Co      | k-line    | 5.04                   | 0.05036 | 4.76   | 0.17      | 3.15   | Co                             |
| Mn      | k-line    | 3.23                   | 0.03228 | 2.50   | 0.10      | 1.77   | Mn                             |
| Al      | k-line    | 0.14                   | 0.00098 | 0.16   | 0.05      | 0.23   | Al <sub>2</sub> O <sub>3</sub> |
| Ti      | k-line    | 0.56                   | 0.00564 | 0.51   | 0.07      | 0.41   | Ti                             |
| S       | k-line    | 0.24                   | 0.00207 | 0.22   | 0.06      | 0.27   | FeS <sub>2</sub>               |
| Total   | /         | /                      | /       | 100.00 | /         | 100.00 | /                              |

2

3

1 Table S2 Comparison of calculated resistance of pure NCM, AT-NCM and ATS-NCM  
2 electrodes.

3

| Matherials | $R_f$ ( $\Omega$ ) | $R_{ct}$ ( $\Omega$ ) |
|------------|--------------------|-----------------------|
| NCM        | 4.26               | 49.54                 |
| AT-NCM     | 3.79               | 42.07                 |
| ATS-NCM    | 2.26               | 37.56                 |

4

1 Table S3 The molar ratio of each element in the before and after cycling ATS-NCM  
2 samples obtained from ICP testing.

| ATS-NCM        | Ni (%) | Co (%) | Mn (%) | Al (%) | Ti (%) | S (%) |
|----------------|--------|--------|--------|--------|--------|-------|
| Before cycling | 88.8   | 5.1    | 3.3    | 0.6    | 0.8    | 1.4   |
| After cycling  | 88.7   | 5.4    | 3.6    | 0.4    | 0.7    | 1.2   |

3
